# Supplementary material for: High density lipoprotein promotes proliferation of adipose-derived stem cells via S1P1 receptor and Akt, ERK1/2 signal pathways
Source: PubMed Central journal article supplement (PMC4453044; doi:10.1186/s13287-015-0090-5), 2015-05-15

Supplemental Figure S1

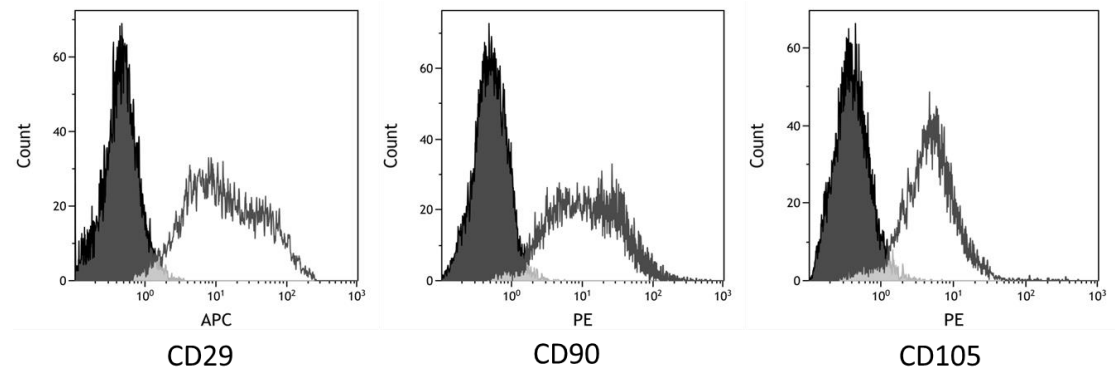

Supplement: 13287_2015_90_MOESM1_ESM.pdf [file 13287_2015_90_MOESM1_ESM.pdf]
